# Supplementary material
Source: PubMed Central journal article supplement (PMC6825538)

Supplementary Figure 1

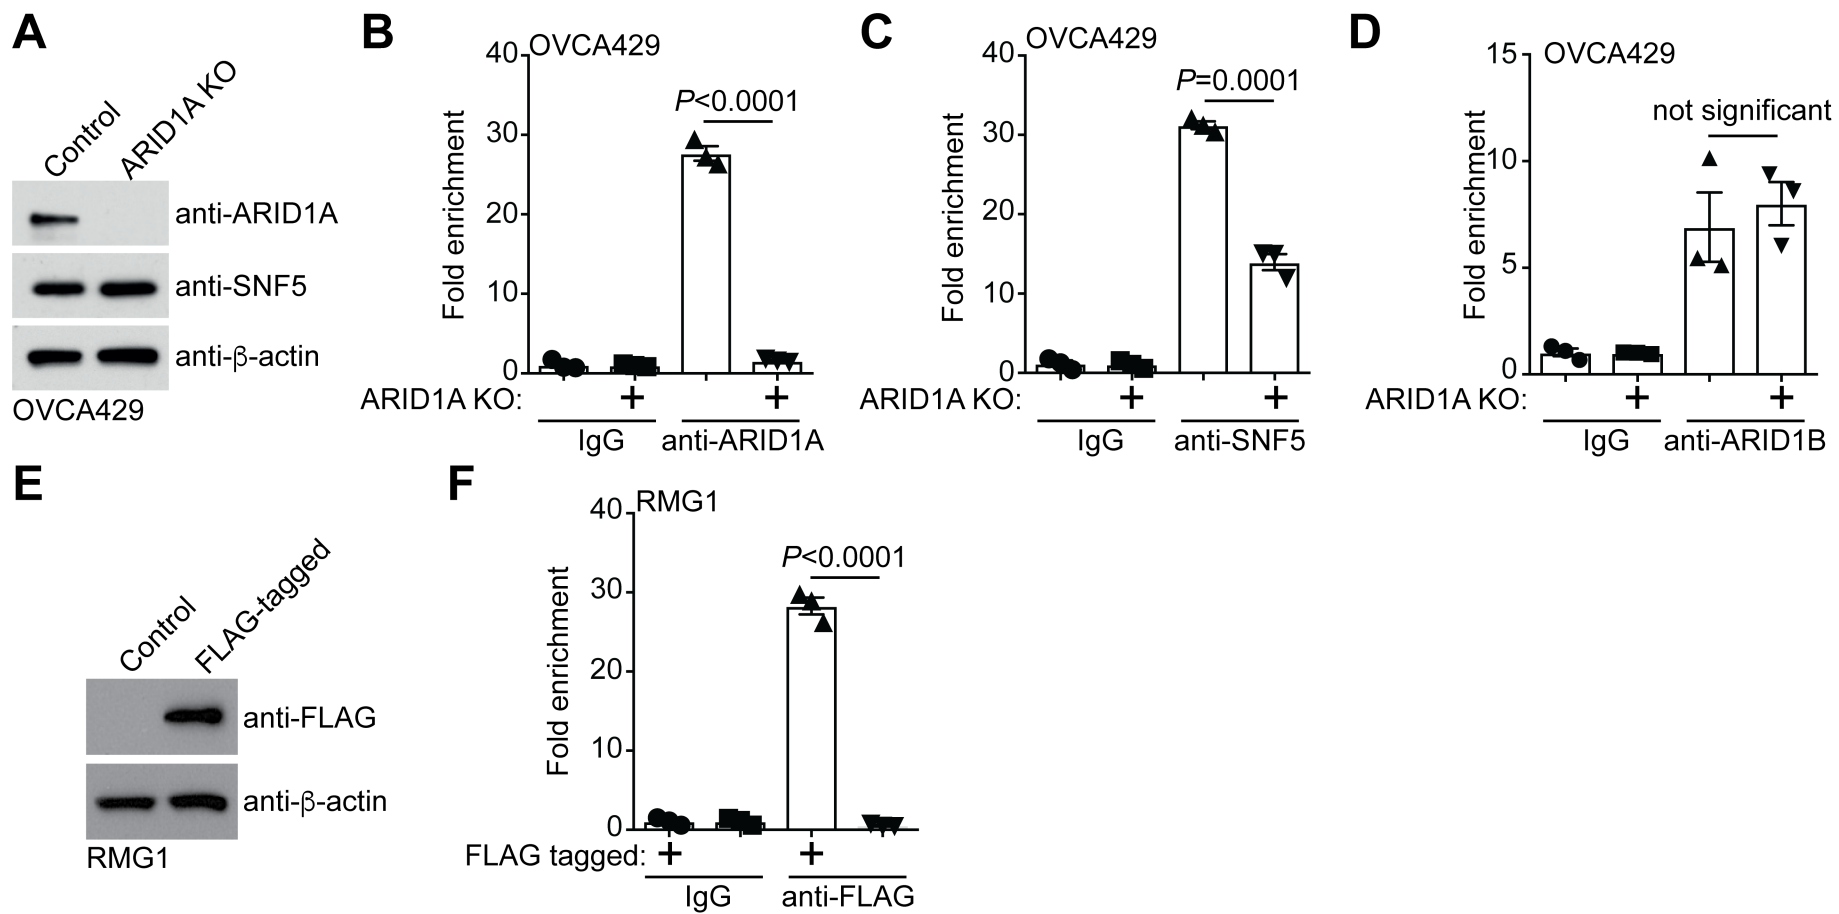

Supplement: NIHMS1534894-supplement-2.pdf [file NIHMS1534894-supplement-2.pdf]

Supplementary Figure 2

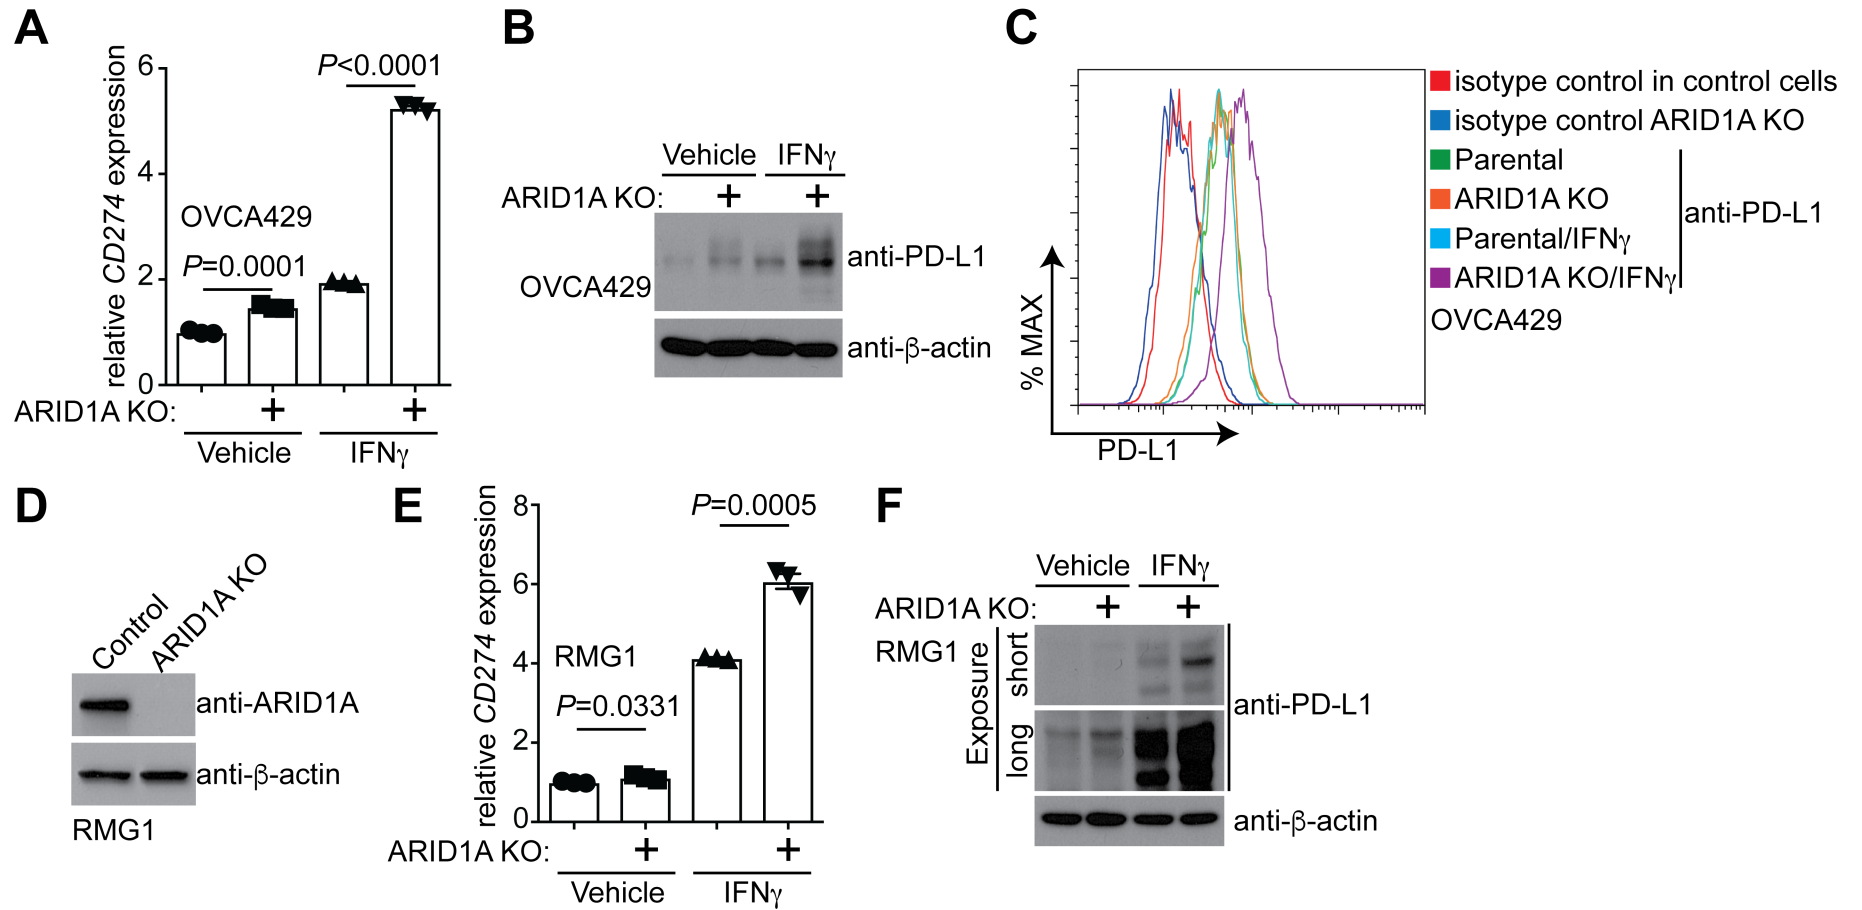

Supplement: NIHMS1534894-supplement-3.pdf [file NIHMS1534894-supplement-3.pdf]

Supplementary Figure 3

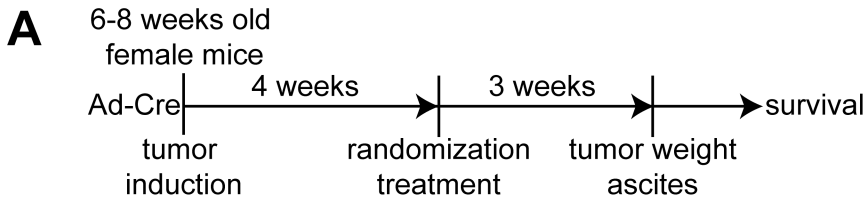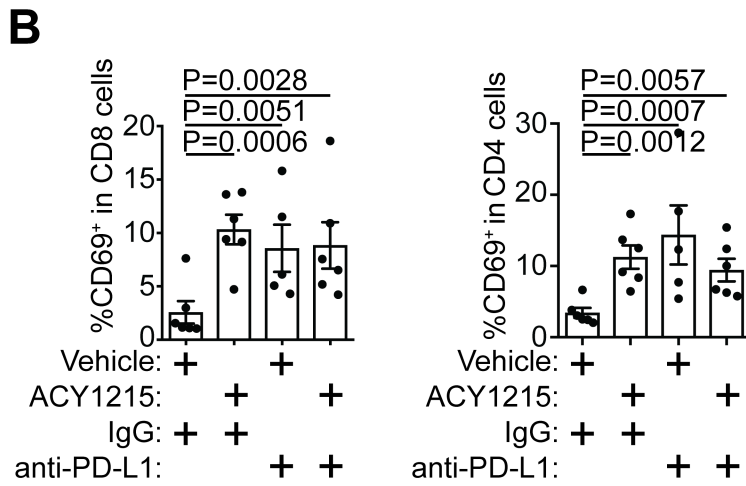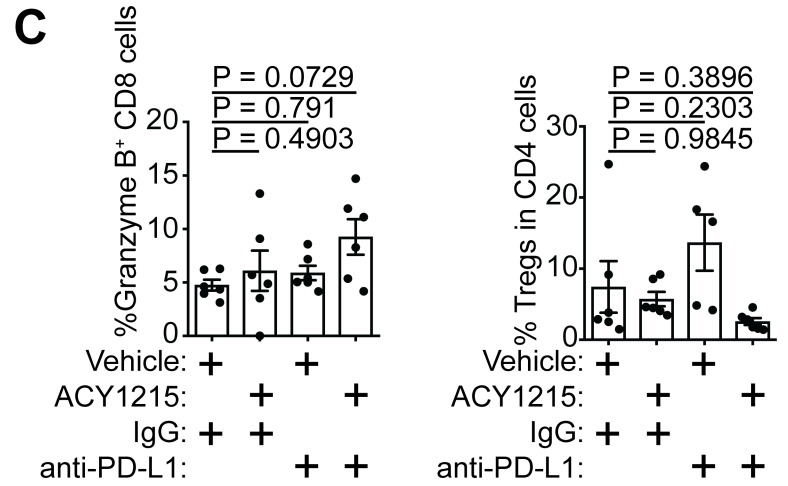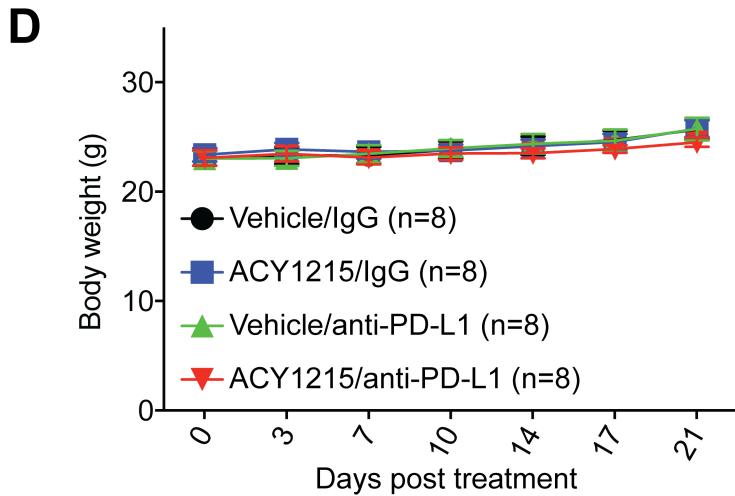

Supplement: NIHMS1534894-supplement-4.pdf [file NIHMS1534894-supplement-4.pdf]
